# Supplementary material for: Core promoter T-blocks correlate with gene expression levels inC. elegans
Source: HighWire-hosted journal article supplement (doi:10.1101/gr.113381.110), 2011-03-02

# **Supporting Materials for “Core promoter T-blocks correlate with gene expression levels in *C. elegans*”**

**Uladzislau Hryshkevich, Tamar Hashimshony and Itai Yanai**

## **Supplemental Information**

Figure S1. T-blocks and A-blocks have similar effect on nucleosome occupancy.

Figure S2. Correlation between T-block occurrences and expression level in expression data from adult and L1 (first larvae) worms.

Figure S3. The correlation between T-block occurrences and expression level is unique to the core promoter.

Figure S4. 3'UTR length correlates with gene expression level.

Figure S5. The T/A rich tail of the SL1 motif is not sufficient to explain the correlation between the number of T-blocks and the presence of the SL1 motif.

Figure S6. The correlation between expression levels and the number of T-blocks is not explained by misannotated operons.

Figure S7. Thymines and T-blocks are enriched relative to adenines and A-blocks in the core promoters of many metazoans.

Figure S8. The distribution of the lengths of 5'UTRs.

Table S1. Motif frequencies across *Caenorhabditis* core promoters.

Table S2. Distribution of T-blocks and A-blocks in the core promoters.

Table S3. Combinatorial analysis.

Table S4. GO analysis.

Table S5. SNPs identified between the CB4856 (Hawaiian) and the reference N2 (Bristol) *C. elegans* strain.

## **Figure captions**

**Figure S1. T-blocks and A-blocks have similar effect on nucleosome occupancy.** To compare the effect of T-blocks and A-blocks on nucleosome positioning, we composed 4 groups of genes: 1. genes with many ( $\geq 4.5$ ) T-blocks and many ( $\geq 3.3$ ) A-blocks, 2. genes with many ( $\geq 4.5$ ) T-blocks, but few ( $\leq 1.4$ ) A-blocks, 3. genes with few ( $\leq 1.9$ ) T-blocks and many ( $\geq 3.3$ ) A-blocks, and 4. genes with few ( $\leq 1.9$ ) T-blocks and few ( $\leq 1.4$ ) A-blocks. The nucleosome occupancy of different groups was compared by Kolmogorov-Smirnov test. The distribution of mean  $\log_2$  nucleosome occupancy of the core promoters in the four gene groups. *P*-values indicate the result of the Komagorov-Smirnov test between each pair of distributions.

**Figure S2. Correlation between T-block occurrences and expression level in expression data from adult and L1 (first larvae) worms.** In a similar fashion to Figure 4, for each set of genes with a given level of expression, the distribution of the number of T-blocks is shown as a heat map. Twenty equally populated groups of genes were defined based upon their gene expression levels. Most genes have a low level of expression, and thus the ten groups with the lowest expression levels were merged into one, '1' group. The remaining ten are shown in the figures as groups 11 through 20. The distribution of T-blocks of each category was compared with that of the '1' group and the *P*-value is indicated to the right. B. same as A for A-blocks. C. and D. are the same as A and B but for expression data from L1 worms. Expression data were obtained from GEO DataSets (adult expression: GSM543285, GSM543286 and GSM543287, L1 expression: GSM146422, GSM146423 and GSM147330) (Irazoqui et al. 2010; Kirienko and Fay 2007) .

**Figure S3. The correlation between T-block occurrences and expression level is unique to the core promoter.** The presentation is the same as in Figure 5. For each of 15 gene regions, including the proximal promoter, starts and ends of the first, second and third exons and introns, 3'UTR, and the 3' adjacent and 3' distal end regions the T-block and A-block frequency is shown for different expression groups. For exons and introns, Ensembl annotation was used to identify the 1<sup>st</sup>, 2<sup>nd</sup>, or 3<sup>rd</sup>, ignoring alternatively spliced introns/exons.

**Figure S4. 3'UTR length correlates with gene expression level.** Genes were binned according to the length of the 3'UTR. The boxplots show the distribution of expression level for each 3'UTR length bin.

**Figure S5. The T/A rich tail of the SL1 motif is not sufficient to explain the correlation between the number of T-blocks and the presence of the SL1 motif.** We truncated the core promoter (Figure 1) by 40bp from the 3'end to remove the T/A rich region of the SL1 motif. We recomputed the SL1-fuzziness and again mapped it onto the heatmap of fuzziness vs. block numbers as in figure 7. Since the results are nearly identical we conclude that the T/A rich tail alone cannot account for the observed correlation.

**Figure S6. The correlation between expression levels and the number of T-blocks is not explained by misannotated operons.** We repeated the analysis shown in Figure 4 on strictly non-operon genes, defined as genes with an upstream and downstream intergenic region of at least 1kb that are not defined as operon genes in Wormbase. The correlation is preserved in this stringently filtered set of genes.

**Figure S7. Thymines and T-blocks are enriched relative to adenines and A-blocks in the core promoters of many metazoans.** **A.** The distribution of the thymine fraction within the forward strands of various metazoan core promoters. **B.** T-blocks are more frequent in the core promoters of most metazoans than A-blocks. Genomes were downloaded from Ensembl (<http://www.ensembl.org/>).

**Figure S8. The distribution of the lengths of 5'UTRs.** According to Wormbase release 210, 82% of the genes have shorter than or equal to 60bp.

## **Tables**

**Table S1. Motif frequencies across *Caenorhabditis* core promoters.**

Frequency of different motifs across *Caenorhabditis* core promoters are shown as percentage of the core promoters containing each motif. Motif frequencies were calculated for motifs identified with  $P < 0.005$ , FDR-corrected.

| Motif<br>Species   | SL1   | Kozak | TATA box | Sp1  | T-blocks |
|--------------------|-------|-------|----------|------|----------|
| <i>C. remanei</i>  | 56.88 | 29.21 | 5.74     | 1.84 | 43.91    |
| <i>C. briggsae</i> | 63.85 | 33.50 | 4.03     | 2.43 | 41.85    |
| <i>C. brenneri</i> | 61.76 | 32.69 | 6.74     | 1.5  | 43.36    |
| <i>C. elegans</i>  | 58.95 | 37.19 | 6.34     | 1.23 | 41.87    |
| <i>C. japonica</i> | 50.53 | 31.46 | 4.85     | 1.2  | 22.98    |

**Table S2. Distribution of T-blocks and A-blocks in the core promoters.**

Numbers of genes with different quantities of T- and A-blocks are indicated. Difference between two distributions ( $P < 10^{-307}$ ) were computed using the Kolmagorov-Smirnov test.

| # of blocks | T-blocks | A-blocks |
|-------------|----------|----------|
| 0           | 670      | 1039     |
| 1           | 1517     | 2623     |
| 2           | 2324     | 3746     |
| 3           | 2820     | 3736     |
| 4           | 3129     | 3043     |
| 5           | 2712     | 1784     |
| 6           | 2137     | 892      |
| 7           | 1276     | 331      |
| 8           | 556      | 87       |
| 9           | 139      | 15       |
| 10          | 19       | 3        |

**Table S3. Combinatorial analysis shows that SL1 and T-blocks are enriched for co-occurrences, while both are depleted in co-occurrences with TATA-box.**

*P*-values are computed using the hypergeometric distribution. Occurrences were defined using the MEME-motifs and a MAST threshold of  $P < 0.005$ , FDR-corrected. Green *P*-values indicate enrichment in motif co-occurrence, while red *P*-values indicate depletion in motif co-occurrences.

| Species \ Motifs   | SL1 and T-blocks co-occurrences | SL1 and TATA-box co-occurrences | T-blocks and TATA-box co-occurrences |
|--------------------|---------------------------------|---------------------------------|--------------------------------------|
| <i>C. remanei</i>  | $10^{-16}$                      | $10^{-72}$                      | $10^{-150}$                          |
| <i>C. briggsae</i> | $10^{-16}$                      | $10^{-52}$                      | $10^{-89}$                           |
| <i>C. brenneri</i> | $10^{-16}$                      | $10^{-115}$                     | $10^{-101}$                          |
| <i>C. elegans</i>  | $10^{-16}$                      | $10^{-35}$                      | $10^{-87}$                           |
| <i>C. japonica</i> | $10^{-16}$                      | $10^{-22}$                      | $10^{-32}$                           |

**Table S4. GO analysis. The table indicates the top 15 GO terms enriched in genes containing both SL1 and T-blocks, and genes containing a TATA-box.**

Blue GO terms indicate association with development, growth and reproduction; while red GO terms indicate association with stress.

| #  | SL1-T-blocks<br>Gene Ontology Terms                      | $P <$       | TATA-box<br>Gene Ontology Terms                             | $P <$       |
|----|----------------------------------------------------------|-------------|-------------------------------------------------------------|-------------|
| 1  | reproduction                                             | $10^{-125}$ | nucleosome assembly                                         | $10^{-125}$ |
| 2  | embryonic development ending<br>in birth or egg hatching | $10^{-11}$  | nucleosome                                                  | $10^{-12}$  |
| 3  | nematode larval development                              | $10^{-11}$  | extracellular region                                        | $10^{-10}$  |
| 4  | growth                                                   | $10^{-10}$  | lysozyme activity                                           | $10^{-5}$   |
| 5  | cell division                                            | $10^{-10}$  | aminoacylase activity                                       | $10^{-4}$   |
| 6  | structural constituent of ribosome                       | $10^{-10}$  | transferase activity, transferring<br>hexosyl groups        | $10^{-4}$   |
| 7  | cytokinesis                                              | $10^{-10}$  | monooxygenase activity                                      | $10^{-4}$   |
| 8  | ribosome                                                 | $10^{-10}$  | binding                                                     | $10^{-4}$   |
| 9  | translation                                              | $10^{-10}$  | iron ion binding                                            | $10^{-4}$   |
| 10 | intracellular                                            | $10^{-8}$   | body morphogenesis                                          | $10^{-4}$   |
| 11 | hermaphrodite genitalia<br>development                   | $10^{-7}$   | 2,3-dihydro-2,3-dihydroxybenzoate<br>dehydrogenase activity | $10^{-4}$   |
| 12 | positive regulation of growth rate                       | $10^{-6}$   | enterobactin biosynthetic process                           | $10^{-4}$   |
| 13 | nucleic acid binding                                     | $10^{-6}$   | DNA binding                                                 | $10^{-4}$   |
| 14 | molting cycle, collagen and<br>cuticulin-based cuticle   | $10^{-5}$   | sugar binding                                               | $10^{-4}$   |
| 15 | negative regulation of vulval<br>development             | $10^{-4}$   | heme binding                                                | $10^{-3}$   |

**Table S5. SNPs identified between the CB4856 (Hawaiian) and the reference N2 (Bristol) *C. elegans* strain.** 78,119 SNPs were identified with a coverage of at least 5 and no heterogeneity. Chromosomal location is relative to WormBase release 195. Table is included as an Excel spreadsheet.

**Reference:**

- Irazoqui, J.E., E.R. Troemel, R.L. Feinbaum, L.G. Luhachack, B.O. Cezairliyan, and F.M. Ausubel. 2010. Distinct pathogenesis and host responses during infection of *C. elegans* by *P. aeruginosa* and *S. aureus*. *PLoS Pathog* **6**: e1000982.
- Kirienko, N.V. and D.S. Fay. 2007. Transcriptome profiling of the *C. elegans* Rb ortholog reveals diverse developmental roles. *Dev Biol* **305**: 674-684.

Figure S1

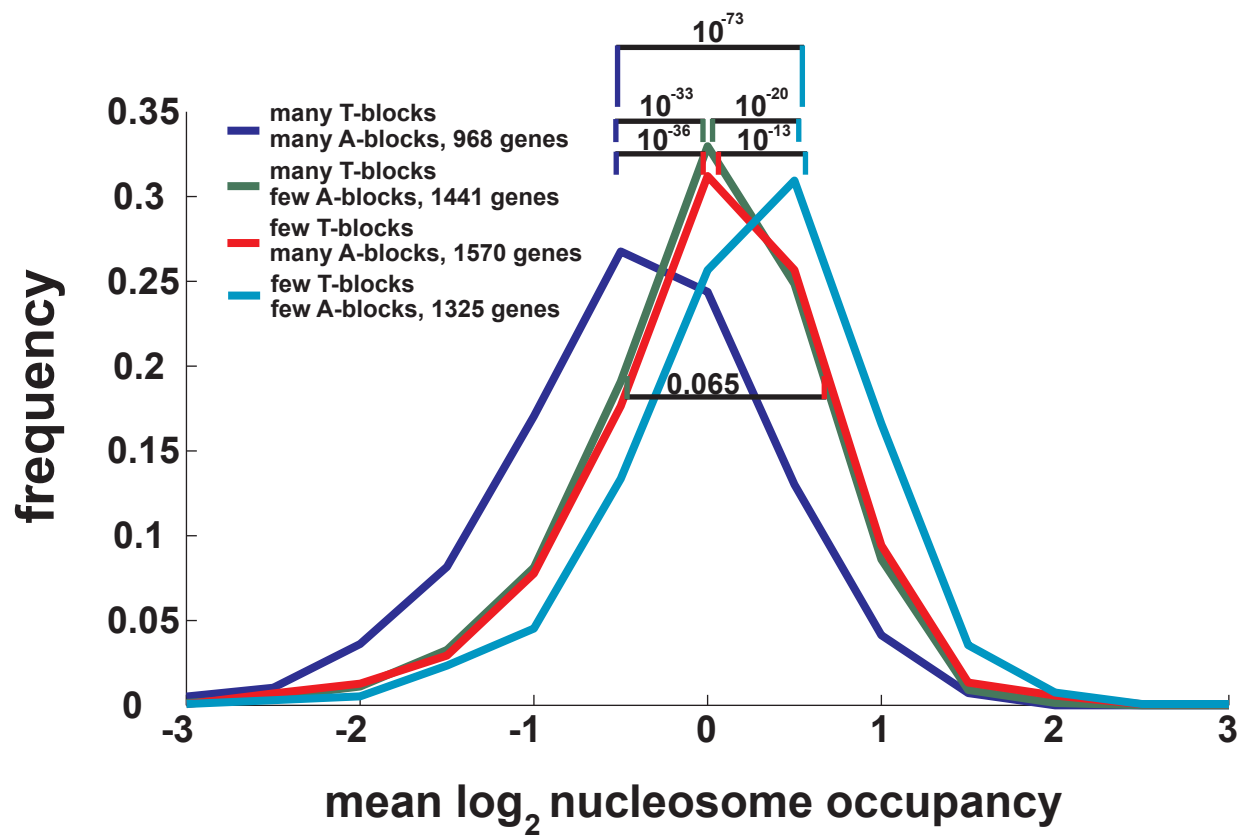



Figure S2

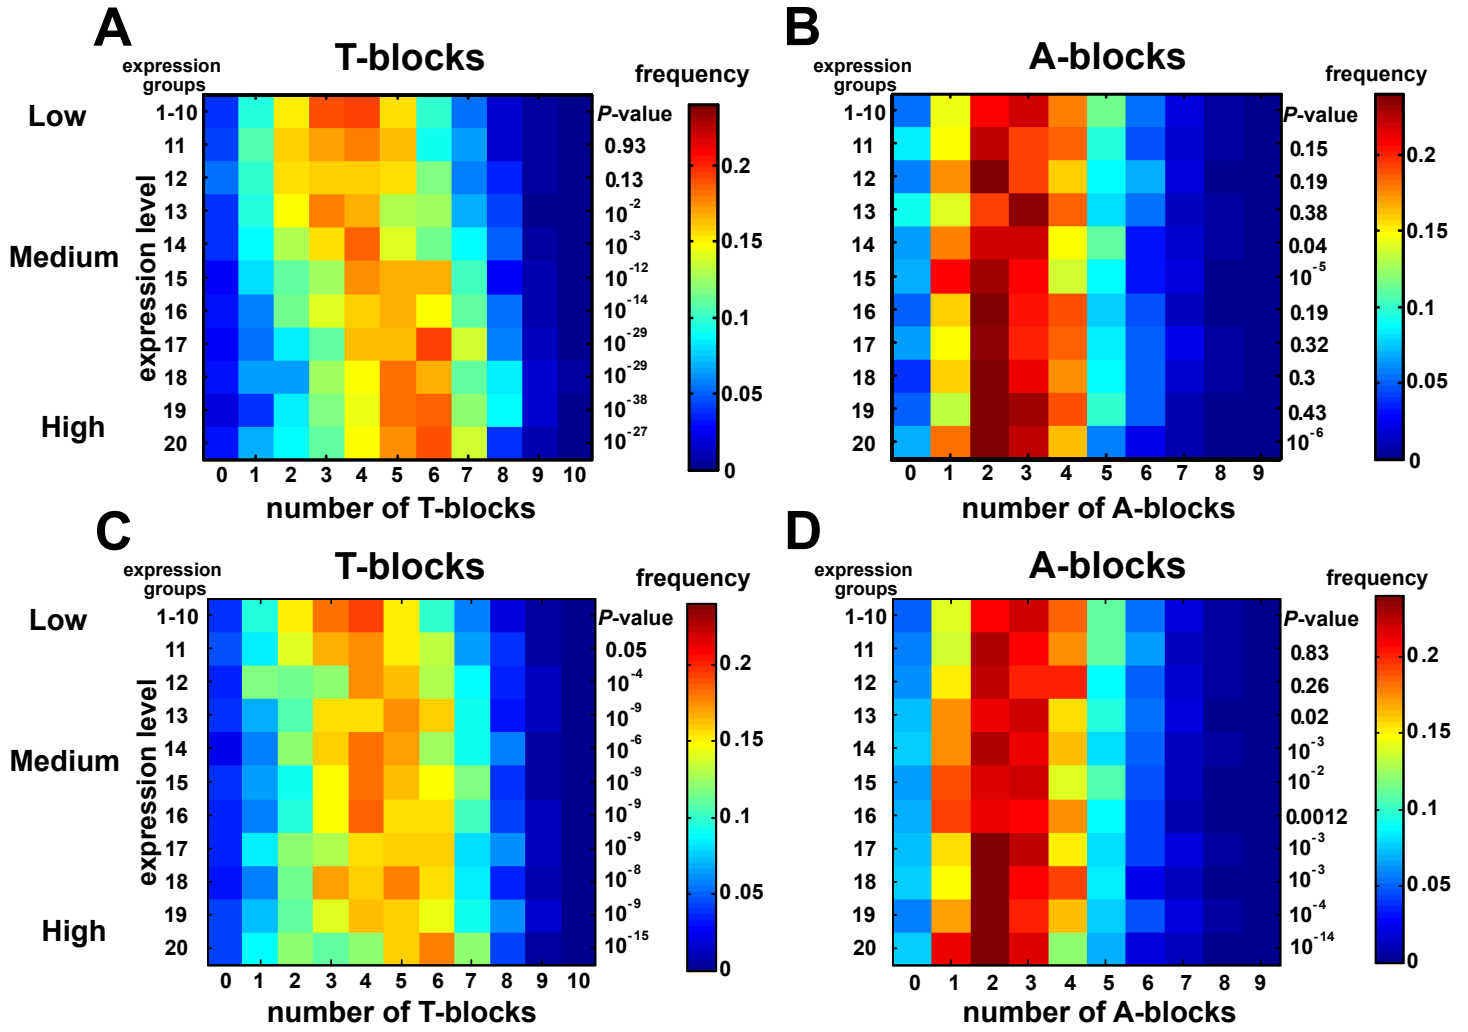

Figure S3

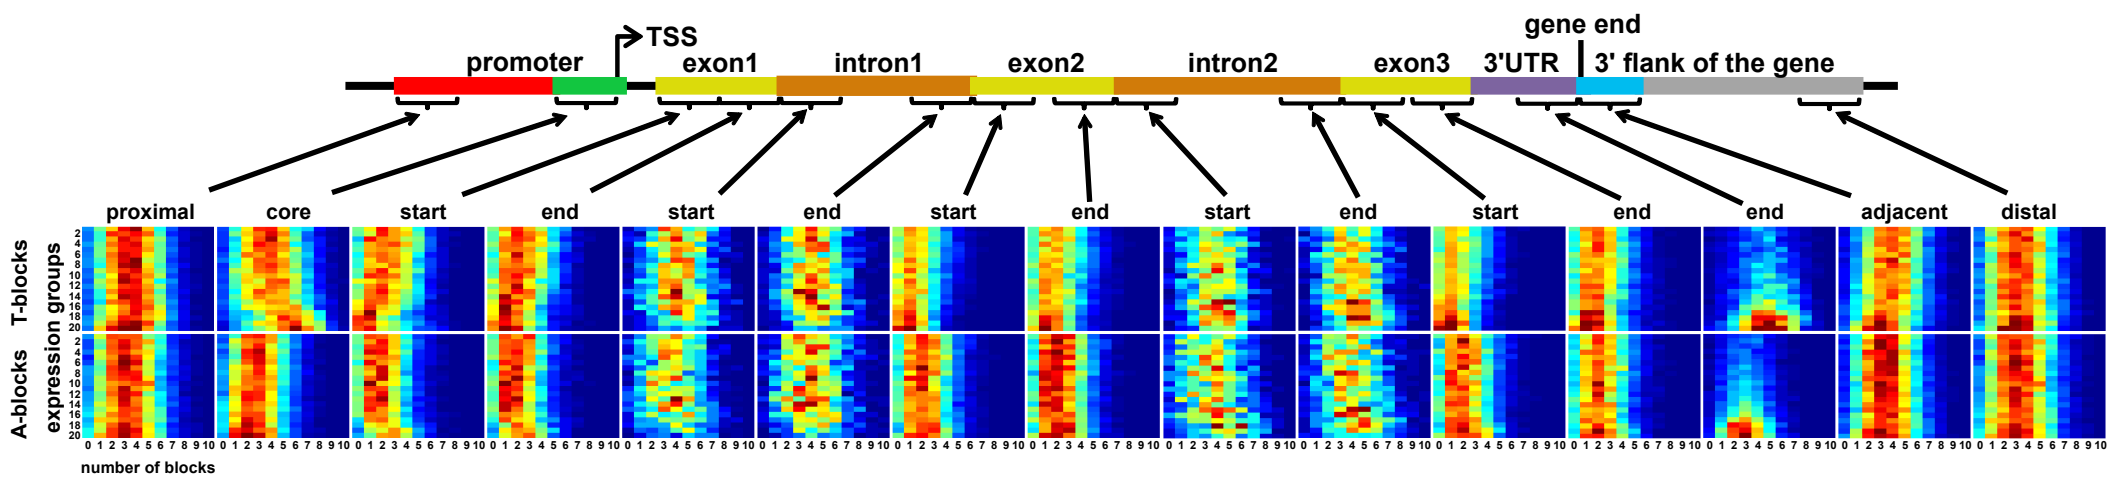

Figure S4

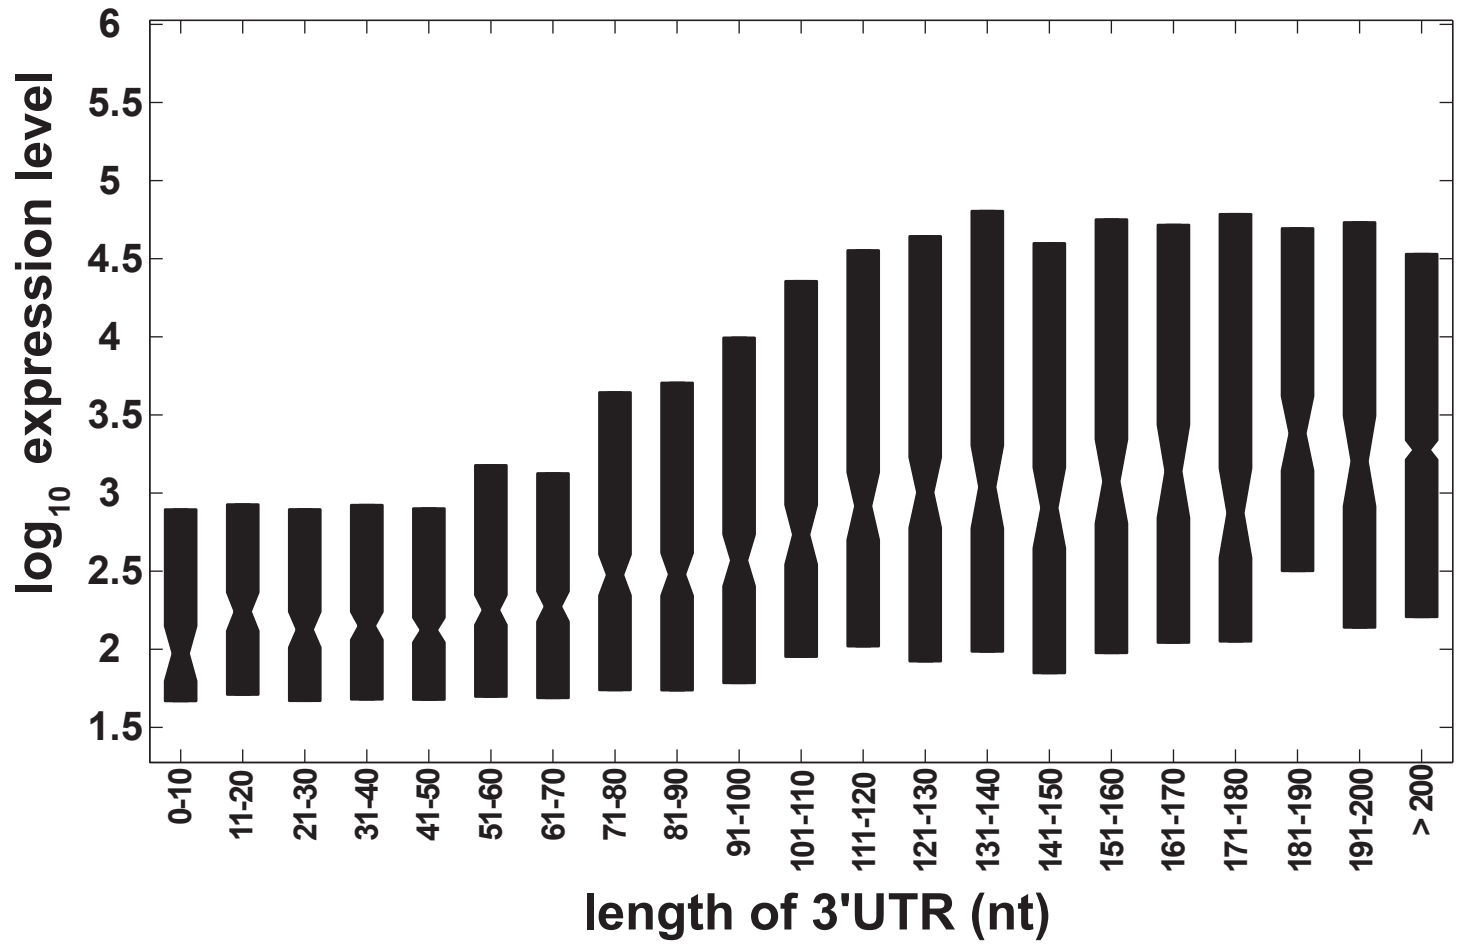

Figure S5

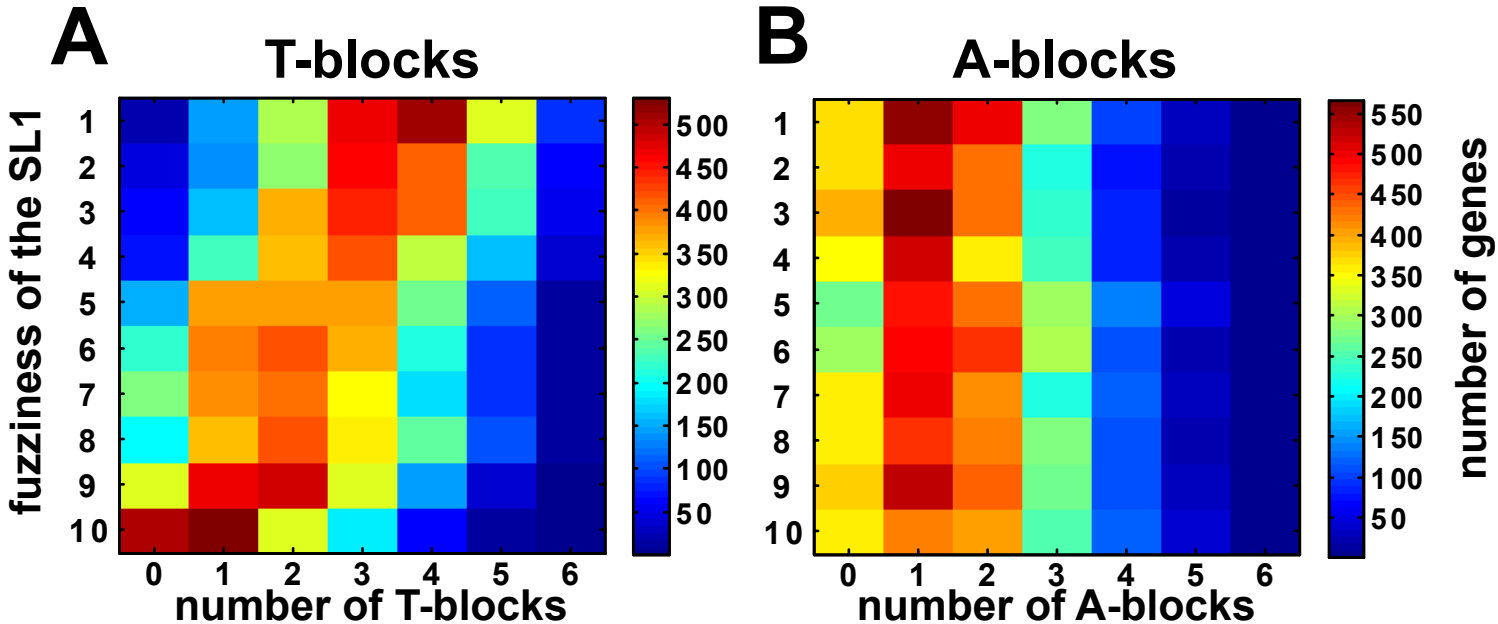

Figure S6

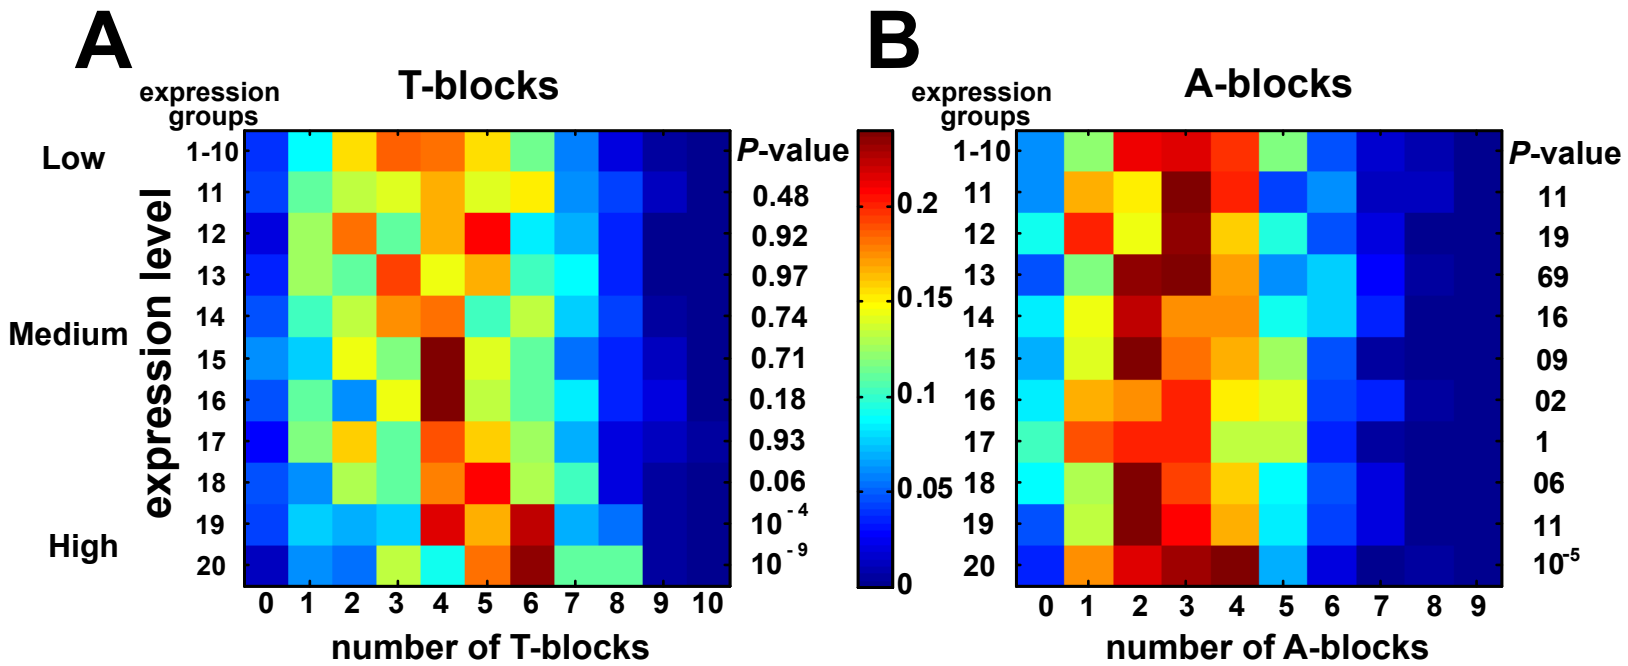

Figure S7

**A**

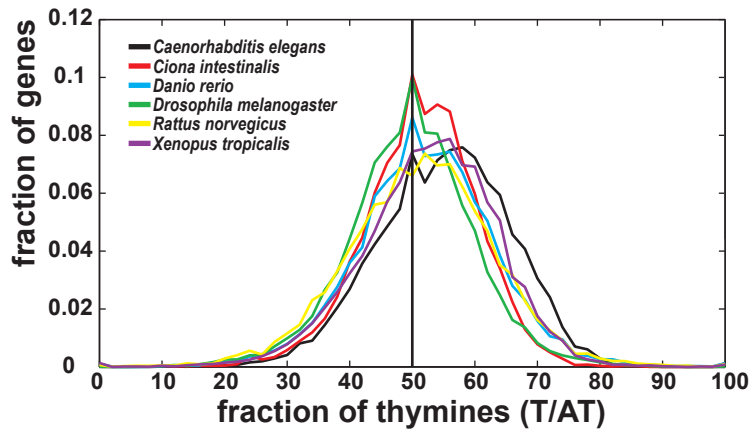

**B**

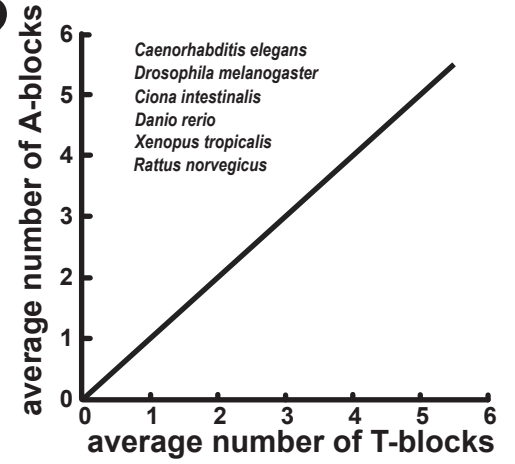

Figure S8

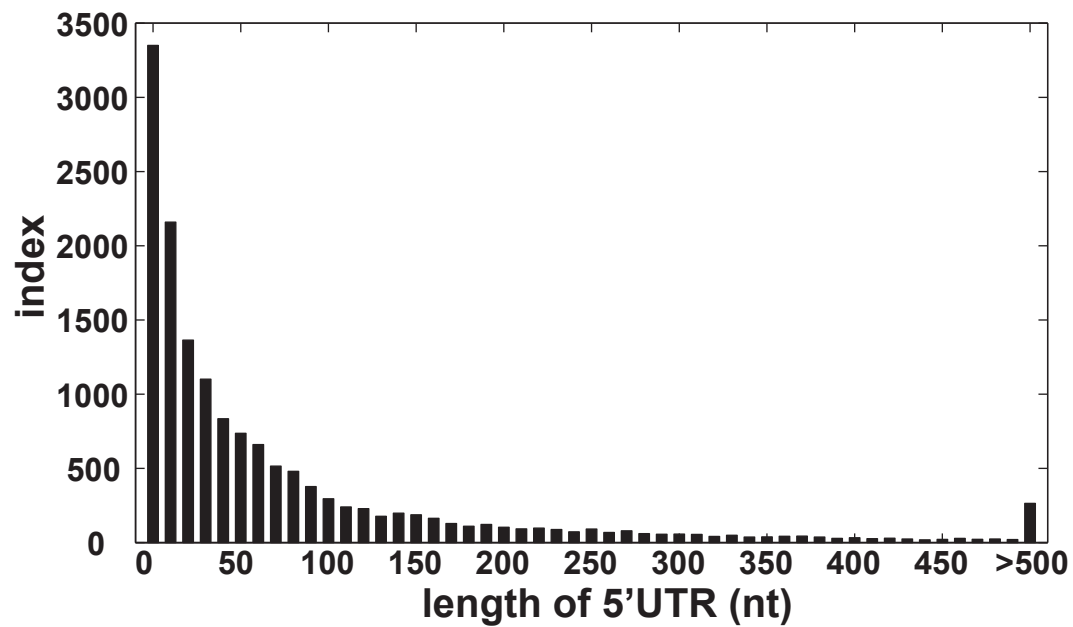

Supplement: Hryshkevich_Supplementary_materials_Revision_with_Figures.pdf [file Hryshkevich_Supplementary_materials_Revision_with_Figures.pdf]
