# Supplementary material for: Core promoter T-blocks correlate with gene expression levels inC. elegans
Source: HighWire-hosted journal article supplement (doi:10.1101/gr.113381.110), 2011-03-02
Supplement: Table_S5.xlsx [file Table_S5.xlsx]

## Sheet: N2_CB4856_SNP
chromosome	position	N2	CB4856	coverage
I	3659	c	T	7
I	4101	a	G	6
I	5026	t	A	9
I	6313	g	T	7
I	6314	t	G	7
I	6415	c	T	6
I	7640	g	A	6
I	7995	t	A	5
I	8174	c	T	6
I	8241	a	G	8
I	10367	t	C	7
I	11574	a	T	9
I	12837	t	C	9
I	12856	c	T	6
I	15024	a	G	9
I	16456	a	G	9
I	17160	g	A	9
I	17200	g	A	8
I	18297	t	A	8
I	19284	a	T	9
I	19285	c	T	9
I	19582	g	T	8
I	19646	a	T	9
I	20232	g	T	9
I	21304	c	G	7
I	21533	c	T	5
I	21741	g	A	5
I	22134	a	G	9
I	23395	c	T	7
I	25116	c	A	5
I	26827	g	A	6
I	27024	t	C	6
I	30611	g	A	7
I	30612	g	A	7
I	30670	t	A	5
I	30671	t	A	6
I	32141	c	A	8
I	32240	c	T	8
I	34248	g	A	7
I	34249	g	T	8
I	34541	a	T	5
I	35733	t	G	7
I	36775	t	C	5
I	37096	c	T	7
I	39041	g	A	6
I	39094	g	A	6
I	39451	g	T	6
I	39717	c	T	8
I	41044	a	C	7
I	41657	a	C	8
I	42048	g	T	9
I	42464	g	T	6
I	43139	c	T	7
I	44544	c	G	8
I	48171	t	C	9
I	48696	a	G	8
I	48904	a	G	5
I	50146	t	C	8
I	51339	a	T	5
I	51354	g	A	8
I	52316	t	C	5
I	54127	t	A	8
I	54251	t	G	6
I	55881	c	T	6
I	56976	a	G	9
I	57175	c	A	6
I	58887	c	T	9
I	59056	a	G	7
I	60086	c	T	6
I	62249	g	A	7
I	62253	a	T	7
I	62304	g	A	9
I	62642	t	C	6
I	63000	t	A	5
I	63775	t	A	7
I	64161	t	G	7
I	67537	a	C	7
I	67546	g	T	8
I	67962	a	G	8
I	69833	g	A	8
I	70433	t	G	7
I	70839	t	A	6
I	70949	g	A	7
I	71049	a	T	9
I	71354	c	A	8
I	72077	t	C	9
I	72302	c	T	7
I	72355	a	G	9
I	72606	t	G	9
I	73862	g	T	6
I	75723	a	T	9
I	76670	g	A	7
I	77939	g	A	5
I	78088	g	A	5
I	79279	a	T	9
I	79484	a	G	7
I	80581	t	C	5
I	83173	t	A	5
I	83287	t	C	8
I	84161	g	T	9
I	84762	a	T	8
I	87318	t	A	5
I	89734	a	T	5
I	91040	a	T	8
I	92126	g	A	9
I	92188	a	G	7
I	93079	g	T	6
I	97016	t	A	5
I	99548	c	A	5
I	101097	a	T	6
I	101906	c	A	5
I	101948	t	A	8
I	102909	c	T	6
I	105339	t	C	6
I	105643	g	T	5
I	105891	t	A	7
I	106525	a	T	9
I	108300	t	G	5
I	108362	a	G	7
I	108600	a	G	8
I	114447	g	A	5
I	115058	c	G	7
I	117089	t	C	6
I	119198	t	A	8
I	119308	g	A	8
I	119486	a	G	9
I	119588	c	T	7
I	120484	c	T	7
I	120615	c	G	6
I	120738	g	T	6
I	123278	a	G	6
I	123856	t	C	5
I	124344	g	A	9
I	124516	t	A	6
I	124546	a	C	5
I	124688	c	T	7
I	125078	g	A	5
I	126111	a	C	6
I	129324	c	T	9
I	130646	t	A	7
I	132320	c	T	8
I	134126	a	T	8
I	134350	t	G	7
I	134954	c	T	9
I	135276	a	C	6
I	135544	t	C	8
I	136310	g	A	7
I	137689	c	A	5
I	137767	t	C	7
I	141329	g	C	9
I	141375	c	T	5
I	142075	g	C	6
I	143789	g	A	6
I	144333	g	A	8
I	146079	a	T	7
I	146363	t	A	6
I	150985	c	T	7
I	153947	t	C	9
I	156417	t	C	7
I	157398	c	T	9
I	157875	a	T	8
I	158750	t	G	9
I	159475	a	G	6
I	161015	t	A	9
I	165275	t	G	5
I	165485	a	G	7
I	165926	a	T	5
I	165927	a	T	6
I	166276	t	C	6
I	166594	a	C	8
I	168679	g	A	8
I	169017	t	G	9
I	169381	g	C	7
I	169665	c	A	8
I	170568	t	A	7
I	171656	a	T	9
I	172510	c	T	6
I	172837	t	C	5
I	173042	t	A	7
I	173184	t	C	5
I	175036	a	G	7
I	176482	a	C	6
I	176512	a	T	7
I	177264	t	A	7
I	177333	c	T	6
I	177538	c	T	6
I	181442	t	C	9
I	183245	a	G	8
I	183688	a	T	5
I	184228	c	T	6
I	184470	g	A	7
I	188682	t	G	9
I	189916	t	C	5
I	191528	t	G	8
I	192093	c	T	6
I	195031	t	A	6
I	195311	a	G	5
I	196760	t	G	9
I	196792	t	C	6
I	198926	g	A	7
I	199032	a	G	5
I	200948	a	T	6
I	200949	c	T	6
I	203395	a	C	8
I	207164	t	C	5
I	207503	c	T	9
I	207511	g	T	8
I	208153	t	A	8
I	210348	a	T	9
I	210602	t	C	6
I	215879	a	G	8
I	218124	t	C	8
I	218364	t	C	5
I	219060	a	G	6
I	219674	t	A	8
I	220384	t	A	6
I	220696	a	G	5
I	220719	a	C	9
I	221810	t	C	6
I	222781	t	G	5
I	222987	g	A	8
I	227525	t	G	6
I	227977	c	G	9
I	229350	t	C	7
I	230922	a	G	6
I	231083	c	T	7
I	231512	t	C	6
I	238244	t	A	9
I	240585	a	C	9
I	241725	t	C	9
I	241995	c	T	5
I	242749	t	C	6
I	246227	c	A	6
I	246533	t	A	7
I	247985	t	C	6
I	249472	g	A	6
I	251455	a	G	8
I	251821	t	C	5
I	252124	a	G	5
I	255782	a	T	8
I	255783	t	C	7
I	257676	a	T	8
I	258881	c	G	5
I	258951	t	G	8
I	259586	g	A	7
I	259615	c	A	5
I	261018	g	A	7
I	262360	g	T	7
I	262560	a	G	6
I	264356	c	A	9
I	265478	g	A	9
I	265500	a	G	9
I	266672	a	G	7
I	268332	t	C	9
I	269427	a	T	9
I	271127	a	C	7
I	272002	t	A	8
I	272537	a	T	6
I	272560	c	A	9
I	274274	t	C	8
I	275616	g	A	8
I	275854	t	A	6
I	276088	g	A	6
I	276703	g	A	6
I	276982	t	A	9
I	276983	t	A	9
I	277052	g	A	8
I	277324	a	G	9
I	277560	c	A	5
I	277993	a	G	6
I	278810	g	A	8
I	279038	g	T	5
I	279327	g	A	9
I	280420	a	G	5
I	283454	c	T	8
I	283686	a	T	7
I	284109	g	T	8
I	284764	a	G	8
I	285206	g	A	5
I	286493	a	T	5
I	287401	t	A	7
I	288429	t	A	9
I	291927	a	C	9
I	292392	a	C	6
I	292982	t	C	8
I	293333	t	C	9
I	293634	t	C	6
I	293863	g	A	7
I	293925	t	C	5
I	295902	a	T	8
I	296416	a	C	9
I	298012	c	T	8
I	298381	g	A	9
I	298407	c	T	7
I	299830	c	T	7
I	300239	t	C	5
I	301234	t	C	6
I	304059	c	T	5
I	307097	g	A	7
I	308817	a	G	6
I	309719	c	T	9
I	310027	t	A	8
I	310689	g	T	8
I	315082	g	A	8
I	315544	t	G	7
I	315546	t	C	7
I	316242	c	T	6
I	320725	a	C	8
I	323119	c	A	5
I	323386	t	A	6
I	323809	a	T	9
I	323867	g	A	6
I	324300	c	T	8
I	324786	t	C	9
I	328113	t	C	6
I	329929	a	T	7
I	330405	g	C	6
I	331714	a	C	8
I	332136	t	G	8
I	332409	a	C	9
I	332458	t	C	5
I	333689	a	G	9
I	333690	a	C	9
I	336673	c	T	5
I	336747	t	A	7
I	336760	t	A	7
I	337001	a	T	7
I	338042	t	C	6
I	341352	c	T	5
I	341633	g	A	6
I	341739	t	C	6
I	342554	c	T	5
I	343438	a	G	9
I	344064	a	T	8
I	345741	c	A	7
I	346112	c	T	6
I	348612	c	T	8
I	349315	t	A	9
I	351313	a	T	7
I	351495	t	A	9
I	352185	g	A	7
I	352746	g	A	8
I	352885	a	T	6
I	352924	t	A	8
I	353664	a	T	5
I	357291	a	C	6
I	359758	t	G	7
I	360613	t	G	8
I	360847	c	T	8
I	361325	c	A	6
I	361957	c	T	5
I	363564	c	A	9
I	363579	c	G	9
I	364027	g	A	7
I	364730	t	A	9
I	366327	c	T	7
I	366563	t	A	7
I	366577	g	T	8
I	366772	g	A	6
I	369552	t	C	6
I	369747	g	T	7
I	369756	t	C	6
I	369897	t	C	6
I	369899	t	A	6
I	370102	g	T	5
I	370754	c	A	7
I	371002	a	T	8
I	371693	t	A	9
I	371887	t	G	9
I	371978	c	T	5
I	372955	t	C	7
I	373070	a	C	8
I	373278	t	C	9
I	373372	t	C	9
I	373443	g	T	8
I	374190	t	A	7
I	374220	g	T	8
I	374479	t	C	5
I	374867	g	A	9
I	377709	a	C	7
I	378335	a	T	5
I	378394	t	C	9
I	378593	a	G	6
I	380950	t	G	7
I	382140	c	T	9
I	382227	t	G	9
I	382321	t	G	7
I	383749	a	C	9
I	385960	t	A	7
I	386007	a	T	6
I	387072	c	T	8
I	387323	t	A	6
I	387440	a	T	6
I	387588	t	C	9
I	387623	t	C	7
I	387722	g	A	5
I	388927	a	G	6
I	388955	t	G	6
I	389416	a	T	5
I	390024	a	C	7
I	390634	g	A	8
I	390894	t	G	8
I	391505	c	T	6
I	392015	g	A	7
I	392442	g	A	6
I	393112	c	T	8
I	393740	c	A	8
I	394973	t	A	9
I	395420	t	G	9
I	395643	t	C	9
I	395660	t	A	9
I	395930	t	A	6
I	395973	t	C	9
I	397094	c	A	8
I	398690	t	G	7
I	399960	a	T	5
I	400156	t	A	8
I	400524	c	G	5
I	400526	g	A	5
I	403136	a	G	9
I	403168	c	A	9
I	403538	c	T	5
I	404082	a	G	6
I	405124	a	T	8
I	405298	c	T	7
I	406646	a	G	8
I	406916	g	C	8
I	408389	a	T	9
I	408390	a	T	9
I	408443	c	T	5
I	408666	a	G	8
I	408867	t	G	7
I	409464	c	A	9
I	409760	g	A	5
I	409843	c	G	6
I	410909	a	T	9
I	412036	a	G	9
I	412112	g	A	9
I	413176	t	A	7
I	413940	g	C	5
I	416586	a	T	6
I	416706	a	C	9
I	418228	c	T	8
I	418614	a	T	6
I	418615	g	C	6
I	418819	a	T	5
I	418977	c	T	9
I	422076	a	G	9
I	423333	a	G	9
I	424787	t	A	8
I	425007	t	C	8
I	426448	c	T	7
I	427703	c	G	7
I	429169	a	G	6
I	431421	c	A	8
I	433292	g	A	9
I	434348	c	T	9
I	436672	a	C	6
I	439086	g	A	9
I	440379	g	A	8
I	442594	g	T	5
I	443085	g	A	7
I	443151	t	C	7
I	443516	a	T	9
I	445400	a	T	6
I	445401	a	T	6
I	445965	g	A	8
I	449396	c	G	5
I	450086	a	T	8
I	450418	t	A	5
I	451275	t	C	5
I	451468	c	G	5
I	452145	c	A	8
I	452646	g	T	9
I	453048	a	T	8
I	454102	a	C	6
I	454995	c	A	8
I	456001	t	G	9
I	456098	t	C	6
I	456535	c	A	7
I	456649	g	A	7
I	457100	t	A	5
I	457768	g	A	9
I	458333	g	A	8
I	458640	t	A	7
I	458641	t	A	7
I	461567	c	T	8
I	462550	t	A	6
I	462687	a	G	8
I	463475	t	C	9
I	463631	g	A	5
I	463930	t	C	6
I	465024	t	A	6
I	465076	t	C	9
I	467847	g	C	8
I	468181	g	A	6
I	468777	a	C	8
I	469050	a	G	9
I	469885	g	A	6
I	470652	t	G	5
I	471515	g	T	6
I	472681	t	C	5
I	473996	a	T	6
I	476403	g	A	5
I	477947	a	G	5
I	478445	c	T	9
I	479280	a	G	5
I	481226	g	A	5
I	482332	c	T	9
I	483395	c	G	5
I	484306	t	C	9
I	484533	t	C	7
I	484774	a	G	5
I	484875	c	G	6
I	487484	t	C	6
I	488235	a	T	9
I	488267	a	G	7
I	489225	g	A	6
I	489411	a	G	9
I	490599	c	A	7
I	493728	t	G	8
I	493798	g	A	7
I	494099	a	T	6
I	495168	a	G	7
I	495357	g	C	7
I	496117	t	G	5
I	496335	t	C	6
I	497136	c	T	5
I	497537	c	T	7
I	498366	t	A	6
I	498739	a	G	9
I	502352	t	C	8
I	502545	t	A	7
I	502755	a	C	6
I	504939	c	T	9
I	505382	a	G	8
I	508136	t	C	6
I	510613	g	A	6
I	513137	a	T	5
I	515466	g	A	5
I	519523	g	A	5
I	520532	g	A	9
I	523447	c	A	6
I	523642	g	T	5
I	524443	a	G	5
I	524666	a	G	9
I	525187	t	C	7
I	525519	c	T	6
I	527927	c	T	7
I	529242	a	T	7
I	530981	t	C	6
I	531358	t	C	7
I	533699	c	T	8
I	533839	a	T	8
I	535179	t	C	7
I	535850	g	A	9
I	537867	a	G	6
I	538653	g	A	9
I	539277	t	A	6
I	540682	c	A	8
I	541421	a	C	6
I	541505	g	A	6
I	542536	a	T	8
I	542657	t	G	5
I	543436	g	C	7
I	543487	a	G	7
I	544239	a	G	9
I	544480	t	C	5
I	544704	c	T	6
I	545015	c	G	9
I	545185	g	T	8
I	545221	a	C	5
I	545471	c	A	7
I	547367	g	C	6
I	547508	g	T	8
I	547838	t	C	8
I	550097	g	A	5
I	550163	t	A	8
I	552251	g	A	7
I	552503	c	T	9
I	552939	a	G	8
I	554463	g	A	7
I	559325	g	A	8
I	559496	t	C	8
I	560519	t	A	9
I	561208	c	T	5
I	562199	a	C	5
I	562692	c	T	9
I	563730	g	T	5
I	563789	c	T	9
I	565579	a	C	5
I	567485	g	T	7
I	568409	g	T	5
I	568649	c	A	9
I	568787	g	A	5
I	568844	g	A	8
I	568854	c	T	7
I	569050	t	C	6
I	571182	t	A	6
I	571538	t	A	8
I	571741	a	G	5
I	572144	t	G	8
I	574364	t	C	7
I	574433	g	A	5
I	576382	t	C	8
I	577693	c	T	7
I	578185	c	T	9
I	579018	a	C	9
I	581861	t	C	8
I	584364	t	A	6
I	584628	a	T	8
I	589616	g	A	9
I	590397	a	T	8
I	592828	c	T	6
I	593037	c	A	5
I	593404	g	T	6
I	596504	a	G	9
I	597352	c	T	8
I	597626	t	A	5
I	598039	g	T	8
I	598511	a	C	5
I	601850	g	A	6
I	602315	t	C	6
I	604175	t	C	8
I	604726	c	T	6
I	604751	a	T	8
I	604752	a	T	8
I	605824	t	C	8
I	606992	a	G	8
I	607947	g	A	7
I	609404	t	C	7
I	611445	a	T	8
I	611575	a	G	9
I	612745	t	A	9
I	614098	t	C	5
I	615918	t	C	9
I	616201	a	G	9
I	618081	a	C	8
I	624206	g	A	7
I	624358	t	G	6
I	624394	t	A	8
I	624599	a	T	7
I	624974	a	T	6
I	625127	g	A	8
I	625857	t	C	9
I	626414	t	C	7
I	626812	t	C	7
I	627593	g	A	8
I	627594	g	T	8
I	631356	g	C	8
I	631707	g	T	6
I	631722	t	C	9
I	632362	t	A	5
I	632502	a	G	5
I	632766	a	T	7
I	636483	t	A	9
I	636679	t	C	6
I	637289	a	G	5
I	637322	t	C	7
I	637366	a	T	5
I	637477	g	A	6
I	637978	g	A	5
I	638497	t	A	6
I	638572	c	T	9
I	638655	a	T	6
I	639242	g	A	7
I	639845	c	T	6
I	640761	g	T	7
I	641013	a	G	8
I	642093	g	C	9
I	642305	t	A	7
I	643240	g	A	6
I	643593	a	G	7
I	643982	t	A	5
I	644086	c	T	8
I	644290	t	G	6
I	644347	t	C	9
I	645503	a	G	9
I	645702	a	G	5
I	646113	c	T	8
I	646587	t	C	7
I	647583	t	A	7
I	647688	t	A	8
I	648145	g	T	8
I	649941	a	T	8
I	650033	t	C	8
I	655098	c	T	5
I	656180	g	A	8
I	656217	a	G	9
I	656287	c	A	6
I	656359	t	A	8
I	656832	t	A	5
I	657598	a	T	8
I	658101	t	A	7
I	658884	c	T	7
I	659226	c	T	6
I	659309	g	A	7
I	659428	g	A	7
I	660020	c	T	8
I	660182	g	A	8
I	660539	c	T	6
I	661428	t	C	6
I	662124	t	A	5
I	662569	t	A	7
I	662836	a	C	5
I	663134	t	C	9
I	663626	c	T	9
I	664681	a	G	5
I	665047	g	A	8
I	665776	c	T	6
I	667067	c	G	7
I	667236	g	A	5
I	667364	c	T	9
I	667423	a	C	7
I	669427	g	A	7
I	672057	a	T	9
I	672410	t	C	5
I	672681	t	A	8
I	673273	c	T	7
I	673310	t	G	6
I	673659	t	G	5
I	674058	a	T	6
I	674341	a	C	8
I	674779	t	A	8
I	675996	t	C	5
I	676182	t	C	5
I	679948	t	C	9
I	679954	c	A	8
I	681460	t	A	6
I	681795	t	G	8
I	682430	t	C	7
I	683250	a	G	9
I	683950	t	C	5
I	684362	t	C	6
I	685040	a	G	8
I	685627	c	T	9
I	685854	c	A	6
I	686079	a	C	9
I	686740	c	A	9
I	688221	a	G	7
I	688421	g	A	9
I	688554	a	T	5
I	689159	a	G	8
I	689172	t	C	5
I	689548	t	G	7
I	689817	c	T	5
I	689991	g	A	7
I	690450	a	G	7
I	690713	g	T	7
I	690755	g	T	7
I	691126	c	A	6
I	691148	a	G	7
I	691247	g	A	7
I	691248	g	A	6
I	695932	a	G	9
I	695973	c	G	7
I	696089	a	T	9
I	696098	c	T	8
I	697679	g	T	7
I	698230	c	T	8
I	698354	t	C	7
I	698391	c	G	8
I	698411	c	T	6
I	700569	a	C	5
I	700825	c	T	7
I	701452	c	T	6
I	701453	a	T	7
I	707542	c	T	6
I	709531	g	A	5
I	712819	c	T	6
I	713658	g	A	8
I	714970	a	G	8
I	715607	c	T	5
I	719923	c	T	5
I	727023	a	T	9
I	738062	a	G	5
I	741805	t	G	6
I	744490	c	T	5
I	744492	a	T	6
I	744974	t	C	6
I	745526	t	C	6
I	746476	g	A	7
I	751118	t	A	7
I	753234	c	T	9
I	754299	g	T	8
I	755114	g	T	7
I	755952	a	C	9
I	756036	t	C	8
I	756173	a	G	9
I	756204	g	T	6
I	757118	t	C	5
I	758510	c	T	6
I	759028	c	T	5
I	759721	t	C	7
I	761007	g	A	7
I	761393	a	G	9
I	763261	a	G	6
I	764324	c	T	5
I	766193	a	T	9
I	769140	t	A	7
I	769446	t	C	6
I	772390	a	G	8
I	772853	t	C	5
I	773716	t	A	9
I	773916	t	A	9
I	774492	g	A	6
I	775588	t	A	6
I	776112	g	T	6
I	776749	c	T	5
I	777927	t	C	5
I	780483	g	T	8
I	781557	t	C	6
I	781673	g	A	5
I	781877	c	T	8
I	784300	c	A	5
I	786275	t	A	7
I	787471	a	G	8
I	787921	a	G	5
I	788161	c	T	6
I	789724	g	A	6
I	792310	t	A	9
I	792978	c	T	9
I	794213	g	C	8
I	796796	t	C	6
I	797250	g	A	7
I	799310	a	G	5
I	800949	a	G	5
I	801859	t	C	6
I	801895	c	T	8
I	801941	a	G	8
I	802275	g	A	5
I	803528	t	A	7
I	804312	c	T	8
I	804653	c	T	5
I	805590	t	C	6
I	806025	c	T	5
I	806200	g	A	9
I	809963	c	A	8
I	813572	t	C	7
I	813766	c	G	8
I	813773	t	A	6
I	814291	a	G	9
I	815363	t	C	7
I	815410	c	A	7
I	815990	t	G	8
I	816633	t	A	7
I	816991	t	G	9
I	818815	a	G	7
I	818828	a	G	5
I	819334	t	G	9
I	821467	t	A	6
I	822965	g	A	8
I	824621	t	C	5
I	825028	a	T	6
I	825193	c	T	7
I	826459	t	C	6
I	827199	a	C	8
I	830096	a	T	7
I	831042	g	A	7
I	835379	a	T	9
I	835845	g	A	5
I	836358	t	C	6
I	837908	g	A	8
I	837927	g	T	8
I	838044	g	C	5
I	838063	c	T	5
I	839224	a	G	5
I	839933	a	G	5
I	840528	g	A	8
I	842524	a	C	8
I	843689	c	T	6
I	846667	t	C	5
I	847074	c	T	6
I	848432	c	A	9
I	848694	c	T	8
I	850994	g	A	9
I	852439	g	C	5
I	852530	a	G	8
I	852647	g	T	6
I	853554	a	G	9
I	854924	g	A	7
I	858356	t	C	6
I	860294	a	G	6
I	860923	a	T	7
I	862672	a	G	6
I	864843	t	A	6
I	865342	c	T	6
I	865620	a	G	7
I	866363	t	A	5
I	869300	t	A	6
I	870332	c	T	9
I	870599	t	A	8
I	870609	t	G	7
I	870818	a	G	9
I	870922	t	A	8
I	872179	a	T	9
I	874772	c	T	6
I	877059	g	A	6
I	877269	g	A	7
I	878752	g	C	5
I	879004	t	C	7
I	880116	c	T	6
I	880236	a	C	8
I	881136	a	T	7
I	882509	a	G	5
I	883770	t	C	8
I	886514	c	T	7
I	887095	t	C	6
I	887375	t	A	6
I	889003	t	A	8
I	889031	t	C	5
I	889120	t	C	7
I	892394	t	A	5
I	893212	a	T	57
I	893215	t	C	69
I	895897	t	A	6
I	899487	c	A	7
I	904448	t	A	6
I	909437	a	T	7
I	909792	g	A	7
I	909908	c	T	7
I	911639	a	G	6
I	912426	t	A	8
I	913512	g	A	6
I	913930	g	A	6
I	915866	g	A	6
I	915906	c	A	8
I	916828	t	C	8
I	918744	t	C	5
I	919555	a	T	5
I	920510	t	G	5
I	920544	a	G	9
I	920804	a	T	9
I	921173	a	T	9
I	922012	g	T	5
I	922117	a	G	7
I	923162	c	T	7
I	923183	c	T	7
I	923280	g	A	9
I	923297	c	T	9
I	925407	c	T	5
I	926897	g	C	6
I	928122	a	G	5
I	928721	t	A	6
I	929431	a	G	8
I	931005	g	T	7
I	931690	t	A	5
I	935031	c	T	7
I	935112	c	T	5
I	935445	a	G	7
I	935670	g	A	8
I	935714	a	T	5
I	935844	c	T	5
I	937543	a	T	5
I	940596	c	G	8
I	941132	t	A	7
I	943586	a	C	5
I	943594	g	T	5
I	948591	c	G	7
I	951134	a	T	5
I	952608	t	C	6
I	953706	t	C	7
I	954182	g	T	5
I	956195	a	T	8
I	956259	c	T	8
I	956299	t	G	9
I	956330	c	T	7
I	956566	c	G	5
I	957163	c	A	7
I	957940	t	C	7
I	959096	c	T	8
I	960042	a	C	8
I	961498	t	C	5
I	962499	a	C	8
I	966293	g	A	9
I	966617	g	T	8
I	966715	a	G	6
I	968331	a	T	5
I	968802	g	C	8
I	970078	c	T	5
I	971348	a	G	5
I	973402	c	T	7
I	973425	a	T	6
I	975277	a	T	5
I	976781	g	A	6
I	976937	a	C	7
I	977426	a	G	6
I	978055	g	T	5
I	979198	a	G	8
I	980245	a	G	6
I	980257	c	A	5
I	980280	a	G	6
I	981188	c	T	7
I	981818	a	T	9
I	981823	c	A	9
I	981871	g	T	8
I	985481	c	T	7
I	985704	t	G	5
I	985929	a	G	9
I	986045	t	G	5
I	986207	a	G	6
I	986341	c	A	6
I	986654	a	T	8
I	987481	g	C	5
I	987804	a	G	7
I	987806	c	T	6
I	988328	t	G	7
I	988464	g	T	6
I	988815	t	G	9
I	989352	a	C	7
I	990151	t	A	5
I	991581	c	T	6
I	992188	c	A	7
I	992268	t	A	8
I	992269	t	A	8
I	993085	c	T	9
I	993560	c	T	6
I	994086	g	A	9
I	994895	t	C	9
I	996300	g	T	5
I	996764	g	A	6
I	997588	t	C	7
I	997604	t	G	7
I	997638	g	A	5
I	997739	a	G	5
I	997762	t	A	9
I	998476	c	A	6
I	998699	g	A	5
I	999983	t	C	9
I	1001262	g	T	7
I	1002047	a	G	5
I	1004031	t	C	8
I	1004272	c	G	8
I	1006936	t	G	6
I	1009173	g	C	5
I	1010784	c	T	7
I	1010915	a	T	5
I	1011736	g	T	9
I	1013827	a	G	7
I	1014790	c	A	7
I	1015202	a	C	7
I	1016363	t	C	8
I	1022683	c	T	7
I	1023135	t	C	8
I	1023775	t	C	8
I	1025099	t	C	9
I	1025100	t	C	9
I	1026146	c	T	7
I	1028719	c	T	5
I	1028722	a	G	5
I	1028879	t	A	8
I	1028880	t	A	8
I	1029887	c	T	7
I	1030003	t	C	9
I	1031083	c	T	6
I	1033656	g	T	6
I	1035796	t	C	6
I	1035897	g	T	6
I	1036085	a	G	8
I	1036210	a	G	5
I	1036854	a	T	5
I	1036868	t	A	8
I	1036962	t	C	6
I	1038137	t	C	9
I	1038995	a	T	6
I	1039370	a	G	5
I	1039474	t	C	6
I	1039987	a	T	9
I	1040104	t	A	5
I	1040198	t	C	7
I	1041274	t	C	6
I	1046701	t	A	5
I	1047157	t	C	6
I	1047176	t	C	6
I	1047205	a	G	5
I	1048128	t	C	8
I	1048781	a	T	9
I	1051165	a	T	7
I	1052049	t	A	8
I	1052729	g	A	7
I	1053548	a	T	7
I	1054084	g	A	9
I	1054168	g	A	7
I	1054173	a	G	9
I	1054226	g	A	5
I	1054277	g	A	5
I	1055169	a	C	8
I	1056219	a	T	6
I	1057134	c	A	6
I	1057249	a	T	7
I	1057540	t	A	9
I	1059715	g	T	5
I	1060828	c	T	6
I	1061529	a	C	7
I	1062094	c	G	5
I	1062732	a	G	7
I	1065912	t	C	8
I	1066153	c	A	9
I	1066166	a	C	6
I	1066370	t	A	6
I	1071206	a	G	5
I	1071439	g	A	5
I	1071647	g	A	9
I	1073800	a	G	9
I	1075094	a	C	8
I	1075354	t	A	8
I	1076995	g	A	9
I	1077161	a	T	8
I	1079165	t	C	8
I	1080117	c	T	9
I	1082773	c	A	5
I	1083139	t	A	7
I	1084111	c	T	8
I	1085364	c	T	6
I	1085390	g	A	9
I	1087415	t	C	8
I	1087795	g	A	8
I	1087899	g	T	7
I	1088135	t	C	5
I	1088142	c	G	7
I	1088876	a	G	6
I	1089082	t	C	8
I	1089794	c	A	7
I	1090254	c	T	9
I	1090958	a	T	6
I	1091827	a	G	6
I	1092220	t	C	7
I	1092252	t	A	7
I	1092280	t	A	5
I	1092583	a	T	9
I	1092595	g	C	9
I	1092638	t	C	8
I	1095001	t	C	6
I	1095002	t	C	6
I	1095026	g	A	5
I	1095072	t	A	9
I	1095122	c	T	9
I	1096111	g	A	6
I	1097739	a	G	5
I	1098055	t	C	5
I	1098419	t	A	6
I	1099357	a	G	8
I	1099903	c	T	6
I	1100863	g	T	6
I	1100990	t	C	7
I	1101551	t	C	8
I	1101877	t	C	5
I	1102051	t	C	7
I	1103091	c	T	6
I	1103708	t	A	9
I	1104348	t	G	7
I	1104386	g	A	8
I	1104838	g	A	5
I	1105425	c	A	6
I	1105431	c	A	5
I	1106671	c	T	7
I	1107870	a	G	6
I	1108809	a	C	7
I	1108821	c	T	8
I	1108887	c	T	6
I	1108891	t	G	7
I	1108943	a	G	9
I	1109070	c	T	5
I	1109091	t	G	7
I	1109151	a	G	5
I	1109154	a	G	5
I	1109701	g	T	5
I	1109716	g	A	7
I	1109725	t	C	6
I	1109824	c	T	5
I	1109827	c	T	8
I	1109896	t	C	6
I	1110733	c	T	6
I	1110742	t	A	7
I	1111043	c	A	6
I	1111053	c	T	6
I	1111090	t	C	6
I	1111097	g	T	5
I	1111207	a	G	6
I	1111264	g	C	7
I	1111482	c	T	8
I	1111526	c	A	5
I	1111857	t	G	5
I	1112034	t	C	7
I	1112082	g	A	5
I	1112085	t	C	5
I	1112213	t	G	7
I	1112238	t	A	9
I	1116261	g	T	6
I	1116282	a	G	7
I	1116611	a	T	5
I	1116668	c	G	7
I	1116680	g	A	9
I	1116755	a	G	6
I	1125021	t	C	6
I	1125101	t	G	8
I	1125223	g	A	5
I	1125547	t	C	6
I	1125917	t	C	6
I	1125986	g	C	9
I	1126257	a	G	7
I	1126434	g	C	5
I	1126465	a	G	5
I	1127240	t	C	8
I	1127335	t	A	5
I	1127336	t	A	5
I	1127363	g	A	6
I	1128649	c	T	8
I	1128936	c	T	5
I	1129184	a	G	6
I	1129485	t	A	8
I	1130916	c	T	8
I	1130938	g	A	8
I	1131411	c	A	5
I	1131997	c	T	8
I	1132497	t	G	7
I	1133700	g	A	6
I	1135499	a	G	8
I	1135727	g	C	7
I	1135881	a	G	8
I	1136115	c	A	5
I	1136985	a	C	8
I	1137054	a	G	9
I	1138157	a	G	5
I	1138268	a	C	5
I	1138277	c	G	5
I	1138442	a	G	6
I	1138755	t	A	9
I	1140312	a	C	6
I	1140573	c	T	8
I	1141863	t	A	9
I	1142103	c	A	7
I	1143148	t	A	5
I	1146325	a	T	6
I	1146483	g	T	5
I	1147301	t	A	7
I	1149991	a	G	8
I	1150611	t	A	9
I	1151051	a	G	9
I	1151157	t	G	5
I	1151180	c	T	9
I	1152065	a	G	6
I	1152385	a	T	9
I	1152419	a	T	6
I	1152897	a	T	8
I	1153530	t	A	8
I	1154277	c	T	8
I	1155210	g	A	7
I	1155448	g	A	5
I	1156847	g	A	5
I	1158459	t	G	6
I	1159974	g	T	9
I	1161818	t	A	5
I	1162904	a	T	9
I	1165107	t	A	6
I	1165833	c	G	5
I	1166359	a	G	5
I	1166367	g	C	5
I	1166702	c	T	9
I	1169004	t	G	6
I	1169011	t	C	7
I	1169809	t	A	8
I	1170336	g	C	5
I	1172800	a	T	9
I	1173627	a	T	8
I	1173657	c	T	7
I	1173682	t	C	8
I	1174025	t	C	7
I	1174189	a	T	6
I	1174425	a	G	8
I	1175324	a	G	5
I	1175927	t	A	7
I	1176010	t	C	6
I	1179215	c	T	6
I	1179519	c	T	8
I	1180043	t	A	8
I	1180493	t	A	9
I	1180601	g	T	8
I	1180976	c	T	9
I	1182282	t	A	7
I	1184849	c	T	7
I	1185148	c	T	5
I	1185265	c	T	5
I	1185404	a	G	7
I	1187023	c	G	9
I	1187278	t	C	8
I	1190001	c	T	9
I	1190785	g	C	8
I	1190944	c	T	8
I	1191078	a	C	7
I	1191734	t	G	7
I	1191798	a	G	9
I	1191899	c	A	6
I	1191902	a	G	6
I	1192483	a	G	9
I	1192607	t	A	7
I	1193114	a	G	6
I	1193787	t	A	9
I	1194074	g	A	8
I	1195137	a	T	6
I	1201189	a	T	8
I	1201394	g	A	7
I	1201795	g	A	9
I	1203955	c	T	6
I	1204229	t	C	5
I	1204323	t	C	6
I	1204903	a	G	9
I	1204921	a	G	7
I	1205039	a	T	6
I	1208108	g	A	7
I	1208329	a	G	9
I	1208811	g	A	6
I	1209000	t	A	9
I	1209837	a	C	8
I	1210773	g	A	7
I	1210928	c	G	6
I	1211385	a	C	8
I	1212676	t	C	9
I	1212724	t	A	8
I	1212778	a	T	7
I	1213391	c	T	7
I	1213428	c	T	7
I	1213627	t	C	5
I	1213821	a	C	7
I	1213968	t	C	6
I	1214145	t	C	5
I	1214241	g	A	8
I	1214264	t	C	9
I	1214350	g	C	8
I	1214465	c	T	8
I	1214485	a	G	7
I	1214861	g	A	9
I	1216142	a	G	9
I	1216149	a	T	9
I	1216339	t	C	7
I	1216943	t	G	5
I	1217443	t	C	8
I	1217563	a	T	5
I	1217744	g	A	9
I	1217849	c	A	5
I	1217985	t	G	6
I	1218126	c	G	7
I	1218223	c	T	5
I	1218344	g	A	5
I	1218449	t	A	7
I	1218733	g	T	5
I	1218785	a	C	5
I	1219401	c	T	5
I	1219423	g	T	9
I	1219570	t	C	6
I	1220613	g	T	8
I	1220617	t	C	7
I	1220764	c	T	6
I	1220804	c	G	5
I	1220856	g	A	8
I	1221024	t	C	8
I	1221059	g	T	5
I	1221137	t	C	5
I	1221191	a	G	7
I	1221747	a	G	8
I	1223349	a	G	8
I	1226271	c	A	8
I	1229033	c	G	9
I	1232340	t	C	8
I	1233660	c	T	5
I	1233746	c	T	9
I	1235062	c	T	8
I	1235411	a	G	8
I	1236037	g	C	9
I	1236355	g	A	7
I	1236599	g	A	8
I	1238141	t	A	7
I	1238142	t	A	6
I	1239794	g	T	7
I	1240142	a	G	9
I	1240344	c	T	7
I	1240406	g	T	8
I	1242459	t	C	5
I	1243862	t	A	5
I	1243869	c	A	7
I	1243973	t	A	8
I	1246211	t	C	7
I	1246240	t	G	6
I	1246532	g	T	7
I	1246543	a	T	5
I	1247240	t	C	5
I	1247312	a	G	9
I	1247542	g	A	7
I	1247667	a	G	7
I	1248252	a	G	9
I	1248416	t	C	7
I	1248465	a	T	8
I	1248466	a	T	8
I	1251885	c	T	8
I	1252249	t	C	6
I	1252849	t	C	6
I	1253093	g	A	7
I	1253634	g	C	5
I	1255496	c	T	5
I	1256241	a	G	6
I	1257970	a	T	7
I	1258707	g	A	5
I	1259301	a	C	7
I	1259972	g	T	8
I	1260258	g	C	9
I	1260823	a	G	7
I	1260866	a	C	5
I	1264679	c	A	8
I	1265969	t	A	5
I	1265982	c	T	7
I	1266253	c	T	8
I	1269246	t	A	8
I	1269604	t	A	9
I	1269631	t	A	8
I	1269788	c	T	9
I	1269894	t	C	8
I	1270232	t	A	5
I	1271354	t	G	8
I	1271410	a	T	5
I	1273894	t	A	7
I	1274667	g	C	5
I	1275417	c	T	8
I	1275629	g	A	9
I	1275771	c	T	8
I	1276164	a	G	8
I	1276392	c	A	8
I	1276655	c	A	8
I	1278208	c	A	6
I	1279437	t	C	9
I	1282315	a	G	5
I	1283376	t	G	6
I	1287299	a	T	6
I	1287872	a	G	8
I	1287917	a	C	9
I	1290834	t	A	9
I	1292035	c	T	6
I	1292296	g	A	6
I	1293477	g	A	6
I	1294289	g	A	9
I	1295617	c	G	6
I	1296266	t	G	8
I	1296313	c	T	6
I	1296694	t	G	5
I	1296795	a	G	7
I	1302733	t	A	6
I	1302751	g	T	8
I	1303481	t	C	7
I	1305350	t	C	8
I	1305438	t	C	9
I	1307665	a	T	6
I	1307666	c	T	7
I	1315292	c	T	8
I	1323011	t	A	5
I	1323150	c	A	5
I	1323157	c	A	7
I	1337069	a	T	9
I	1337070	c	T	8
I	1345551	g	A	6
I	1348422	a	G	5
I	1352626	a	C	7
I	1354497	a	G	8
I	1354965	a	T	5
I	1355052	a	C	8
I	1358428	c	T	6
I	1360162	t	C	6
I	1360193	t	C	8
I	1361107	a	G	5
I	1365680	t	C	8
I	1367897	a	T	5
I	1368074	c	A	9
I	1370089	g	A	8
I	1375045	g	T	7
I	1377454	a	G	6
I	1377839	g	T	8
I	1378284	t	A	6
I	1378870	t	A	5
I	1379653	t	A	9
I	1380614	g	A	5
I	1381125	g	T	5
I	1382555	a	T	8
I	1383336	t	G	6
I	1383384	c	A	6
I	1383399	c	T	6
I	1384787	a	T	7
I	1384911	g	T	5
I	1385258	a	G	7
I	1385342	t	A	7
I	1385612	g	A	8
I	1387481	g	A	5
I	1387678	a	C	9
I	1387758	t	C	7
I	1387805	t	C	7
I	1389574	a	G	8
I	1389986	g	C	5
I	1390274	t	G	9
I	1390476	a	C	7
I	1390526	t	A	7
I	1391476	a	T	6
I	1391540	g	A	8
I	1392798	g	C	8
I	1393120	t	A	7
I	1393127	t	C	8
I	1394222	t	C	9
I	1394283	g	C	5
I	1394988	g	A	7
I	1395128	a	T	9
I	1395161	g	A	9
I	1395294	t	A	9
I	1395329	a	G	8
I	1395647	a	G	8
I	1395879	g	A	5
I	1396174	g	A	7
I	1396758	g	A	8
I	1396936	a	T	8
I	1397247	t	A	7
I	1397829	c	T	7
I	1397996	c	T	7
I	1398534	c	T	6
I	1398536	c	G	6
I	1400364	g	A	7
I	1401166	g	T	9
I	1401295	a	C	5
I	1404440	a	G	6
I	1404718	g	A	7
I	1405854	g	A	6
I	1407589	a	C	8
I	1411621	c	A	6
I	1411894	g	C	9
I	1415386	t	C	8
I	1416015	t	A	9
I	1416045	c	T	9
I	1416131	g	C	7
I	1421475	t	C	7
I	1422790	a	G	6
I	1422996	a	G	6
I	1423023	a	T	8
I	1423344	g	A	8
I	1424034	t	A	6
I	1424317	t	A	7
I	1424396	a	G	5
I	1424823	g	A	8
I	1425093	t	A	6
I	1425297	g	T	8
I	1425791	t	C	6
I	1425870	g	T	8
I	1427549	a	G	7
I	1430789	g	C	8
I	1432631	c	T	7
I	1433304	t	A	8
I	1433754	c	A	6
I	1433761	c	A	5
I	1434024	a	C	7
I	1434270	g	A	9
I	1435204	t	C	9
I	1435471	g	C	5
I	1436113	a	G	8
I	1436535	t	C	6
I	1436645	t	G	7
I	1436713	a	T	8
I	1436811	a	C	9
I	1436962	a	G	5
I	1437250	t	A	5
I	1437633	g	T	6
I	1437774	t	G	8
I	1439677	c	T	5
I	1441688	c	A	8
I	1442246	t	A	8
I	1442659	g	A	6
I	1442820	a	C	6
I	1443836	t	A	9
I	1444097	c	T	6
I	1448656	t	C	9
I	1451410	c	T	7
I	1451655	c	G	8
I	1453036	a	C	7
I	1454360	c	T	6
I	1457265	c	T	9
I	1459064	t	C	6
I	1459192	g	T	9
I	1460653	a	G	8
I	1461335	a	T	9
I	1463259	a	G	7
I	1464462	t	C	6
I	1465422	g	A	8
I	1465548	a	G	6
I	1465575	g	C	7
I	1466138	c	T	7
I	1466301	c	T	7
I	1466321	c	T	5
I	1466450	g	A	5
I	1466492	g	A	8
I	1466591	t	C	7
I	1466640	g	A	5
I	1466772	a	C	6
I	1468650	g	A	8
I	1469330	t	A	6
I	1469563	t	G	5
I	1469957	a	T	6
I	1469964	t	A	5
I	1470846	g	A	9
I	1471345	t	C	7
I	1473707	g	A	9
I	1475312	t	A	5
I	1475790	g	A	9
I	1476241	g	T	7
I	1476495	t	A	6
I	1477397	t	C	7
I	1477410	c	T	9
I	1477483	t	A	7
I	1479003	a	G	8
I	1479699	a	G	8
I	1480004	c	T	5
I	1481322	a	G	7
I	1481858	c	A	8
I	1482236	c	T	7
I	1482259	c	T	7
I	1482649	a	C	5
I	1482712	g	A	5
I	1483257	g	A	6
I	1483655	a	T	5
I	1483847	t	C	6
I	1484844	a	G	7
I	1486670	a	T	9
I	1489002	c	G	9
I	1489686	a	G	9
I	1489797	c	A	8
I	1492348	t	A	9
I	1494848	t	A	8
I	1495865	t	G	5
I	1497000	t	G	6
I	1497057	t	G	7
I	1497089	g	A	9
I	1497353	a	T	6
I	1499002	t	G	6
I	1499925	a	C	5
I	1500303	c	T	8
I	1500433	g	A	5
I	1501604	a	G	8
I	1501783	g	A	5
I	1503261	t	C	7
I	1503998	a	G	5
I	1504303	t	C	8
I	1504564	t	C	8
I	1504949	c	T	6
I	1506104	a	T	6
I	1506738	c	G	9
I	1506831	c	T	8
I	1507352	c	T	6
I	1507884	t	A	5
I	1510149	g	A	6
I	1516423	a	T	8
I	1516713	a	T	6
I	1517292	c	G	6
I	1517730	t	C	6
I	1517890	c	A	5
I	1520109	t	C	5
I	1520218	t	C	8
I	1520404	a	T	6
I	1523207	g	A	7
I	1523728	a	T	6
I	1523859	t	A	6
I	1524007	c	T	6
I	1524290	a	T	7
I	1525584	t	A	6
I	1525983	a	C	8
I	1526036	g	T	7
I	1526064	t	C	8
I	1526128	g	T	6
I	1526191	t	C	6
I	1526242	g	A	6
I	1528979	t	C	7
I	1529223	c	A	9
I	1529268	t	C	8
I	1529392	t	C	9
I	1530213	a	T	6
I	1530425	t	G	5
I	1531890	c	T	5
I	1531975	t	A	7
I	1532088	g	C	8
I	1533065	c	T	5
I	1533178	c	G	9
I	1533841	c	T	7
I	1538060	t	C	9
I	1539484	a	T	8
I	1540854	a	T	5
I	1544074	a	G	6
I	1544158	t	G	5
I	1544253	g	T	6
I	1544695	t	C	8
I	1545465	g	A	5
I	1545604	t	C	6
I	1546046	t	A	6
I	1546103	t	C	7
I	1546279	g	A	6
I	1547610	c	T	5
I	1549342	a	C	8
I	1550281	a	C	6
I	1550615	a	G	6
I	1552385	g	A	6
I	1552631	t	C	9
I	1553088	g	T	9
I	1554273	a	G	6
I	1554640	g	T	5
I	1555352	g	T	9
I	1556092	c	A	5
I	1556393	g	C	6
I	1557673	t	C	7
I	1557699	t	C	7
I	1557985	c	T	7
I	1558210	a	T	5
I	1558474	t	A	8
I	1558501	g	A	7
I	1558969	a	G	9
I	1559479	c	T	5
I	1560547	g	A	9
I	1560583	c	T	9
I	1562796	a	G	8
I	1563021	a	T	7
I	1563141	a	T	6
I	1563427	a	T	6
I	1564214	t	G	7
I	1564233	g	A	5
I	1564779	a	G	5
I	1565218	c	A	5
I	1565391	a	G	5
I	1566918	t	C	6
I	1567754	g	A	7
I	1571802	g	A	7
I	1572124	t	A	8
I	1573199	c	T	7
I	1573864	a	G	8
I	1574529	t	A	8
I	1575288	c	A	6
I	1575415	a	G	8
I	1575533	t	G	8
I	1575548	c	T	6
I	1575705	c	G	5
I	1575837	t	G	5
I	1576111	t	A	5
I	1578319	a	G	9
I	1578775	t	G	5
I	1580598	g	T	9
I	1580800	g	T	8
I	1580996	g	C	6
I	1581158	t	A	7
I	1581197	a	G	6
I	1581531	a	G	5
I	1581809	c	T	6
I	1582135	c	T	7
I	1582142	a	G	6
I	1583156	g	A	6
I	1583362	a	G	6
I	1583371	c	T	6
I	1583713	g	T	5
I	1584493	a	G	7
I	1585382	a	C	8
I	1585987	g	A	6
I	1586266	g	T	9
I	1586608	g	A	7
I	1586920	t	C	5
I	1586929	t	A	6
I	1587264	t	C	7
I	1588591	c	T	9
I	1589992	t	G	6
I	1590008	a	C	9
I	1590544	c	T	5
I	1591348	t	G	7
I	1591434	a	T	5
I	1592182	c	T	5
I	1592594	g	A	9
I	1592735	c	T	7
I	1592784	a	T	7
I	1594393	a	G	5
I	1594485	t	G	6
I	1595249	a	G	7
I	1595403	g	A	7
I	1597283	a	T	7
I	1598852	t	G	9
I	1600075	t	A	6
I	1600076	t	A	6
I	1600452	t	C	8
I	1600580	a	G	6
I	1601131	t	A	6
I	1601644	t	A	8
I	1602443	a	G	5
I	1602468	t	C	6
I	1602640	c	A	5
I	1603398	t	A	6
I	1603987	a	C	8
I	1605099	a	T	8
I	1605225	c	A	8
I	1605370	g	A	9
I	1605371	t	A	9
I	1605454	a	T	8
I	1605794	c	G	6
I	1606209	t	C	6
I	1606737	g	A	9
I	1608766	t	G	8
I	1608779	t	A	5
I	1609059	c	T	6
I	1609369	g	A	5
I	1609398	a	G	8
I	1609492	c	T	9
I	1609800	g	T	9
I	1609852	g	T	8
I	1610529	g	T	5
I	1610704	a	G	6
I	1610724	a	G	8
I	1610965	c	G	9
I	1611011	t	A	5
I	1611052	t	A	7
I	1611421	g	T	9
I	1612195	c	T	6
I	1612297	g	A	8
I	1613283	t	G	8
I	1615179	g	A	7
I	1615181	t	C	8
I	1615535	a	C	6
I	1615593	a	G	6
I	1615930	c	G	5
I	1616081	c	A	6
I	1616381	c	A	8
I	1616507	t	C	6
I	1617373	c	T	9
I	1617631	g	A	5
I	1617649	c	T	8
I	1617667	g	T	5
I	1617836	t	A	5
I	1618076	a	T	7
I	1618364	t	C	5
I	1618704	g	T	5
I	1618800	t	A	7
I	1620765	a	G	7
I	1620809	t	A	6
I	1621328	a	T	7
I	1621357	g	A	6
I	1622636	t	G	8
I	1624242	c	T	8
I	1625239	c	T	8
I	1625660	a	T	5
I	1626142	t	C	5
I	1626277	t	A	6
I	1626310	c	T	7
I	1627110	g	A	6
I	1627706	t	C	6
I	1627879	g	A	9
I	1630377	g	A	5
I	1631890	g	C	5
I	1634041	t	A	8
I	1634203	a	G	6
I	1634228	a	T	8
I	1635217	a	G	8
I	1635753	t	G	5
I	1635924	t	A	8
I	1636768	t	A	8
I	1636824	a	G	9
I	1636947	t	C	7
I	1637360	c	T	7
I	1637854	t	C	6
I	1638315	a	T	6
I	1638453	a	C	6
I	1638516	t	C	8
I	1639598	g	A	9
I	1639891	c	G	5
I	1640030	a	T	5
I	1640686	a	G	5
I	1640744	a	T	5
I	1641801	c	A	7
I	1641826	a	G	6
I	1642421	g	A	7
I	1642991	a	T	6
I	1643068	c	G	5
I	1644597	a	G	7
I	1644911	c	T	7
I	1646425	a	G	6
I	1647222	c	G	5
I	1647316	a	T	7
I	1648465	g	A	8
I	1648587	a	C	6
I	1648608	t	G	8
I	1648912	g	A	5
I	1649059	a	T	6
I	1650104	t	G	5
I	1654362	t	C	5
I	1654440	c	T	5
I	1654588	g	A	9
I	1657241	t	C	7
I	1657527	t	A	7
I	1657900	c	T	9
I	1660568	t	C	8
I	1660875	t	C	5
I	1661041	g	A	6
I	1661177	c	T	9
I	1661447	c	T	9
I	1663289	a	G	6
I	1666417	t	G	9
I	1667062	c	T	6
I	1667092	t	C	9
I	1667206	g	A	6
I	1667829	g	A	5
I	1668869	t	G	5
I	1669238	a	G	5
I	1673091	a	G	5
I	1673865	c	T	7
I	1675396	t	A	5
I	1675397	t	A	6
I	1677917	g	A	9
I	1678619	g	T	6
I	1678712	g	A	5
I	1679071	t	C	6
I	1679873	t	C	8
I	1680453	g	A	7
I	1681732	t	A	8
I	1682635	a	G	5
I	1682993	a	G	6
I	1683934	t	A	6
I	1686617	t	C	7
I	1687286	a	C	6
I	1688138	t	C	8
I	1688540	a	G	7
I	1689322	c	T	7
I	1690684	t	A	9
I	1690685	a	G	9
I	1690741	c	A	9
I	1690750	c	T	6
I	1691394	a	C	7
I	1693001	c	T	9
I	1693625	a	C	6
I	1693733	a	G	6
I	1694562	a	C	6
I	1695464	g	A	7
I	1695721	t	A	9
I	1696099	g	A	6
I	1696739	g	A	6
I	1696999	t	A	7
I	1698676	a	C	6
I	1699197	c	T	5
I	1700576	t	G	8
I	1703054	a	G	7
I	1708013	a	T	6
I	1708014	a	T	7
I	1708244	c	T	8
I	1709093	t	A	8
I	1709582	t	C	7
I	1710377	g	C	9
I	1712853	a	G	5
I	1712871	g	T	6
I	1713926	g	A	9
I	1714856	g	A	9
I	1715278	c	A	8
I	1716804	t	A	9
I	1718085	a	T	8
I	1718621	t	A	7
I	1723011	c	G	8
I	1723017	a	T	7
I	1724768	c	T	7
I	1724797	c	T	9
I	1725947	c	A	8
I	1726397	a	G	7
I	1727037	t	G	7
I	1727193	t	G	5
I	1727223	t	A	8
I	1730620	a	C	5
I	1736233	t	G	7
I	1736528	a	G	9
I	1738587	g	T	5
I	1738609	a	T	5
I	1738956	g	T	5
I	1742865	g	T	9
I	1742900	g	A	7
I	1742909	t	C	7
I	1743426	g	C	9
I	1744105	g	T	9
I	1744247	t	C	6
I	1744408	a	G	6
I	1744471	t	C	6
I	1744484	c	T	8
I	1744591	c	T	9
I	1744675	g	T	9
I	1744827	c	A	9
I	1749383	g	A	9
I	1749471	a	C	9
I	1749540	g	A	9
I	1749582	t	A	6
I	1749613	t	G	7
I	1749747	a	G	9
I	1749832	t	C	5
I	1750615	g	A	9
I	1750696	t	C	7
I	1750704	a	C	9
I	1750814	g	C	5
I	1750817	g	T	5
I	1751395	g	A	7
I	1751403	g	T	9
I	1753072	g	T	7
I	1753630	g	A	9
I	1754690	c	T	6
I	1754870	c	T	6
I	1754908	c	T	9
[truncated: 76,120 more rows]
